# Supplementary material for: Cancer neoantigen prioritization through sensitive and reliable proteogenomics analysis
Source: PubMed Central journal article supplement (PMC7145864; doi:10.1038/s41467-020-15456-w), 2020-04-09
Supplement: 41467_2020_15456_MOESM3_ESM.pdf [file 41467_2020_15456_MOESM3_ESM.pdf]

## **Description of Additional Supplementary Files**

File Name: Supplementary Data 1

Description: Variant peptide identification results for the label-free data.

File Name: Supplementary Data 2

Description: Variant peptide identification results for the TMT data.

File Name: Supplementary Data 3

Description: Variant peptide identification results for the iTRAQ data.

File Name: Supplementary Data 4

Description: Somatic variant peptide identification results for the label-free data.

File Name: Supplementary Data 5

Description: Somatic variant peptide identification results for the TMT data.

File Name: Supplementary Data 6

Description: Somatic variant peptide identification results for the iTRAQ data.

File Name: Supplementary Data 7

Description: Neoantigen prediction results for the label-free data.

File Name: Supplementary Data 8

Description: Neoantigen prediction results for the TMT data.

File Name: Supplementary Data 9

Description: Neoantigen prediction results for the iTRAQ data.

File Name: Supplementary Data 10

Description: Somatic variant peptide identification result for the immunopeptidomics data.

File Name: Supplementary Data 11

Description: Genetic algorithm search space for neural architecture search.
